# Supplementary material for: Ovalbumin-Derived Peptides Activate Retinoic Acid Signalling Pathways and Induce Regulatory Responses Through Toll-Like Receptor Interactions
Source: MDPI journal article supplement (doi:10.3390/nu12030831), 2020-03-20
Supplement: s1 [file s1]

**A**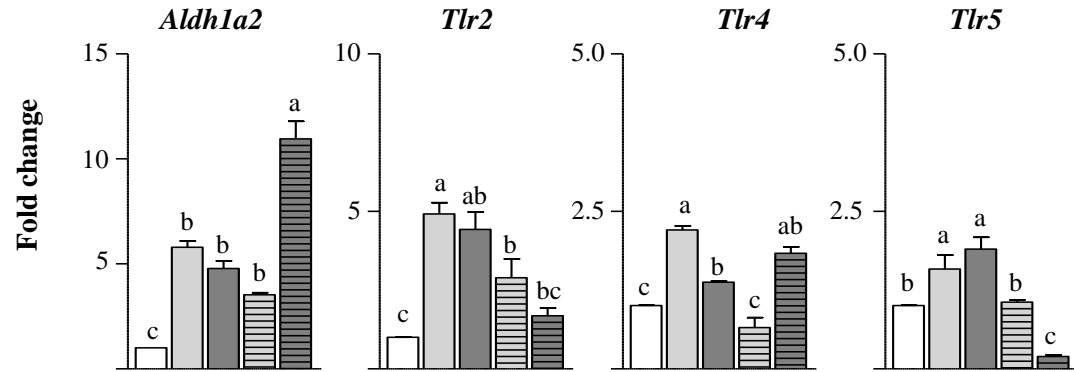**B**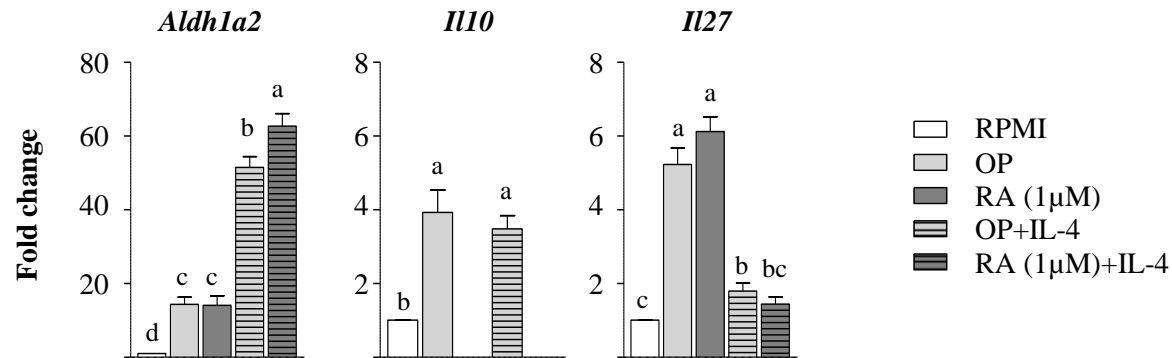

**Supplemental Figure 2.** Gene expression in MLN-DCs (**A**) and spleen-DCs (**B**) from naïve mice cultured for 24 h with different stimuli (OP, RA, OP+IL-4, or RA+IL-4), assayed by qPCR, normalized to the reference gene *Actb*, and expressed relative to DCs cultured in RPMI. Data are means  $\pm$  SEM (biological and technical triplicates). Different letters indicate statistically significant differences ( $p < 0.05$ ) calculated using Mann-Whitney U test.
