# Supplementary material for: Ovalbumin-Derived Peptides Activate Retinoic Acid Signalling Pathways and Induce Regulatory Responses Through Toll-Like Receptor Interactions
Source: MDPI journal article supplement (doi:10.3390/nu12030831), 2020-03-20
Supplement: s1 [file s1]

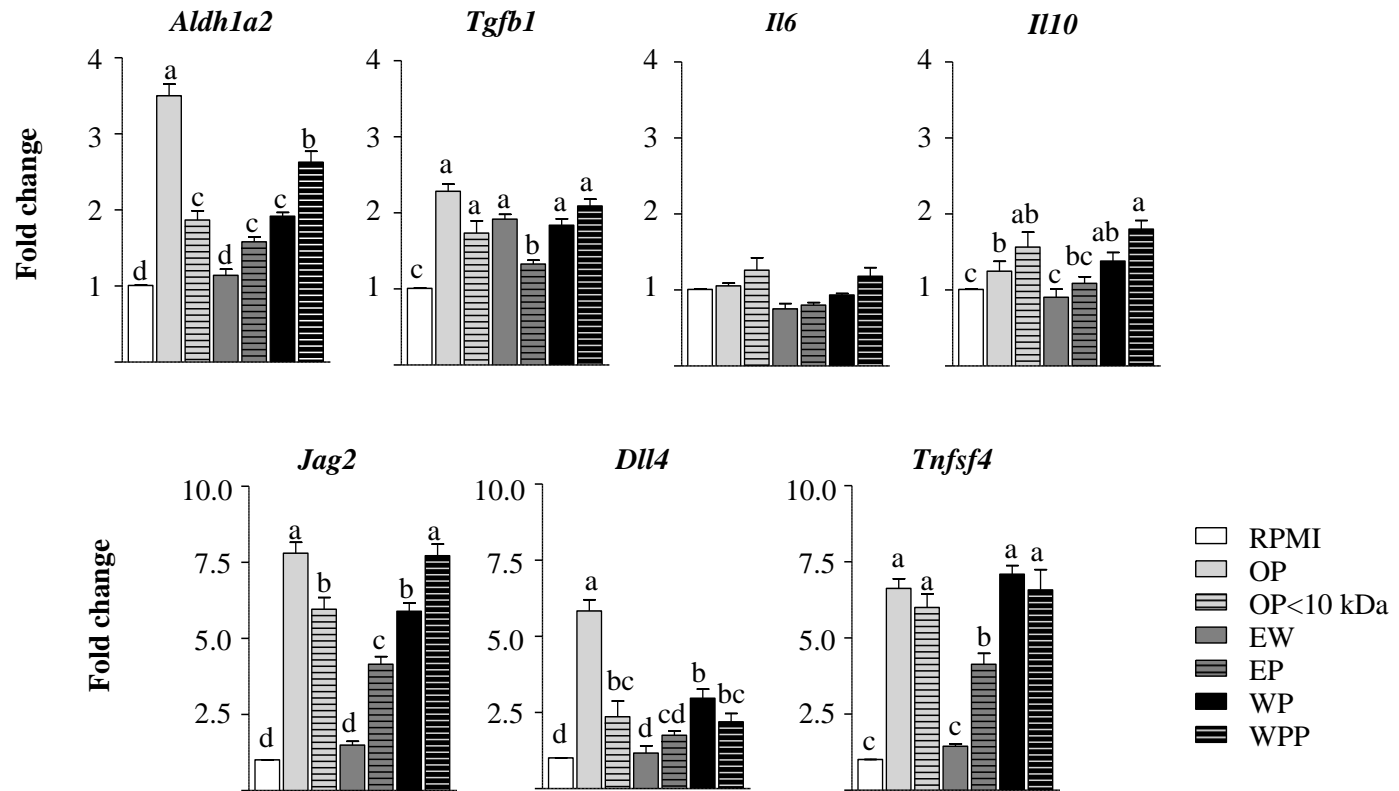

**Supplemental Figure 1.** Gene expression in BM-DCs from naïve mice cultured for 24 h with different stimuli [OP, the fraction of OP with molecular mass lower than 10 kDa (OP<10 kDa), EW, EW hydrolysed with pepsin (EP), WP, or WP hydrolysed with pepsin (WPP)], assayed by qPCR, normalized to the reference gene *Actb*, and expressed relative to BM-DCs cultured in RPMI. Data are means  $\pm$  SEM (biological and technical triplicates). Different letters indicate statistically significant differences ( $p < 0.05$ ) calculated using Mann-Whitney U test.
