# Supplementary material for: Ovalbumin-Derived Peptides Activate Retinoic Acid Signalling Pathways and Induce Regulatory Responses Through Toll-Like Receptor Interactions
Source: MDPI journal article supplement (doi:10.3390/nu12030831), 2020-03-20
Supplement: s1 [file s1]

**A**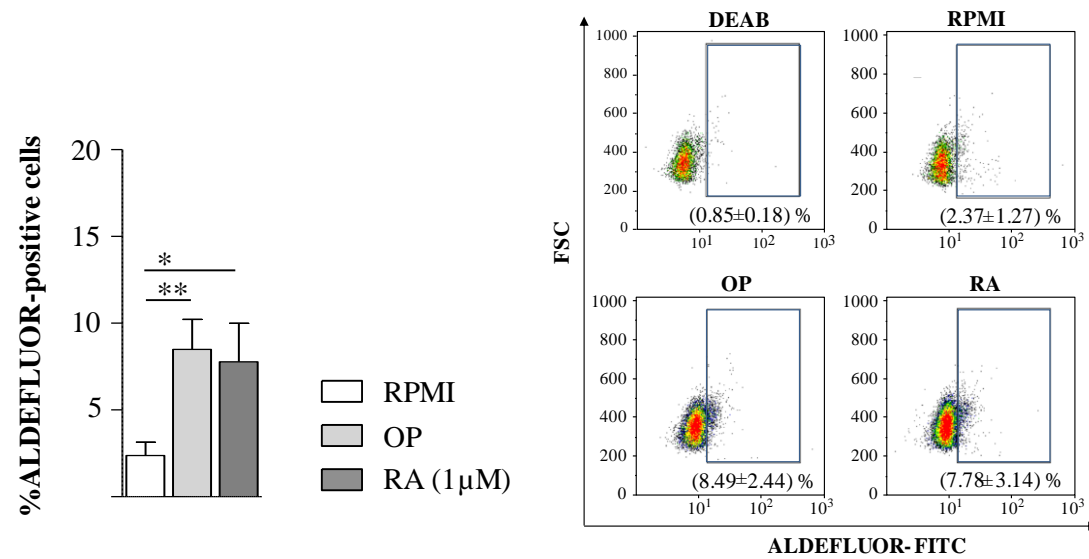**B**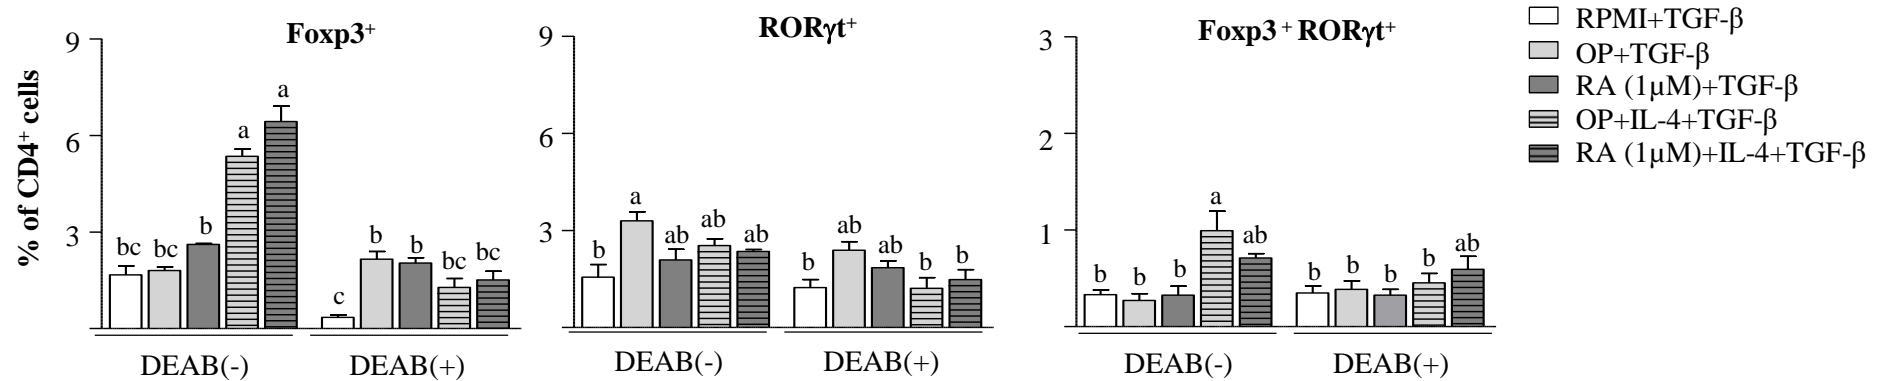

**Supplemental Figure 3. A.** ALDH activity, as assessed by ALDEFLUOR assay, in spleen CD4<sup>+</sup> T cells from naïve mice cultured without stimuli (RPMI), or with OP or RA for 2 days, followed by stimulation with anti-CD3 and anti-CD28 for 2 additional days. The ALDH inhibitor DEAB was used to determine baseline background fluorescence. Data are means ± SEM (biological and technical triplicates) and statistically significant differences were calculated using unpaired two-tailed Student's t test (\* p < 0.05 and \*\* p < 0.01). **B.** Percentage of Foxp3<sup>+</sup>, RORγt<sup>+</sup> and Foxp3<sup>+</sup> RORγt<sup>+</sup> cells within the total CD4<sup>+</sup> T cell population in spleen from naïve mice cultured with TGF-β without stimuli (RPMI), or with OP, RA, OP+IL-4, or RA+IL-4 for 2 days, in the absence or presence of the ALDH inhibitor DEAB, followed by stimulation with anti-CD3 and anti-CD28 for 2 additional days. Data are means ± SEM (biological and technical triplicates). Different letters indicate statistically significant differences (p < 0.05) calculated using one-way ANOVA, followed by Tukey post-hoc test.
