# Supplementary material for: Ovalbumin-Derived Peptides Activate Retinoic Acid Signalling Pathways and Induce Regulatory Responses Through Toll-Like Receptor Interactions
Source: MDPI journal article supplement (doi:10.3390/nu12030831), 2020-03-20
Supplement: s1 [file s1]

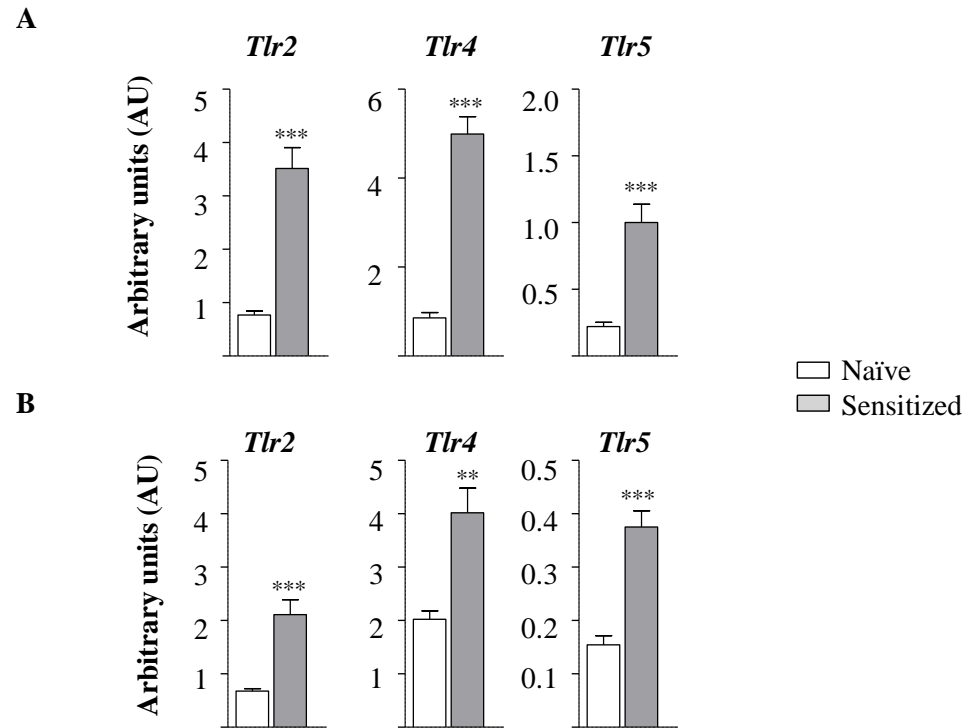

**Supplemental Figure 4.** Gene expression in MLNs (**A**) and spleens (**B**) from naïve and EW-sensitized mice, assayed by qPCR and normalized to the reference gene *Actb*.

Data are means  $\pm$  SEM (biological and technical triplicates). Different letters indicate statistically significant differences (\*\*  $p < 0.01$  and \*\*\*  $p < 0.001$ ) calculated using Mann-Whitney U test.
